# Supplementary material for: In situ analysis of the nucleation of O- and Zn-polar ZnO nanowires using synchrotron-based X-ray diffraction
Source: Royal Society of Chemistry journal article supplement (doi:10.1039/d1nr06099f), 2021-12-17
Supplement: d1nr06099f1.pdf [file d1nr06099f1.pdf]

*In situ* analysis of the nucleation of O- and Zn-polar ZnO nanowires  
using synchrotron-based X-ray diffraction

Valentina Cantelli,<sup>1</sup> Sophie Guillemin,<sup>1</sup> Eirini Sarigiannidou,<sup>1</sup> Francesco Carlá,<sup>2</sup> Bruno Bérini,<sup>3</sup> Jean-Michel Chauveau,<sup>3,4</sup> Dillon D. Fong,<sup>5</sup> Hubert Renevier,<sup>1\*</sup> and Vincent Consonni.<sup>1\*</sup>

<sup>1</sup> *Université Grenoble Alpes, CNRS, Grenoble INP, LMGP, F-38000 Grenoble, France.*

<sup>2</sup> *ESRF, 71 avenue des Martyrs, F-38000 Grenoble France.*

<sup>3</sup> *Université Versailles Saint-Quentin, Université Paris Saclay, CNRS, GEMAC, F-78035 Versailles, France.*

<sup>4</sup> *Université Côte d'Azur, CNRS, CRHEA, Rue Bernard Gregory, F-06560 Valbonne, France.*

<sup>5</sup> *Materials Science Division, Argonne National Laboratory, 9700 S. Cass Ave., Lemont, IL-60439, United States.*

\*Corresponding authors: [hubert.renevier@grenoble-inp.fr](mailto:hubert.renevier@grenoble-inp.fr) and [vincent.consonni@grenoble-inp.fr](mailto:vincent.consonni@grenoble-inp.fr)

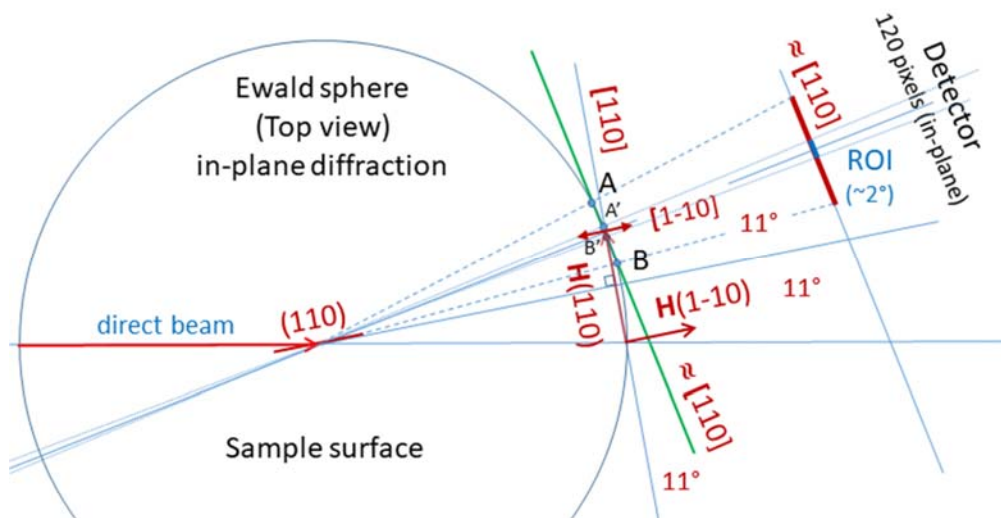

**Fig. S1** Schematic representing the configuration used during the in-plane XRD measurements.

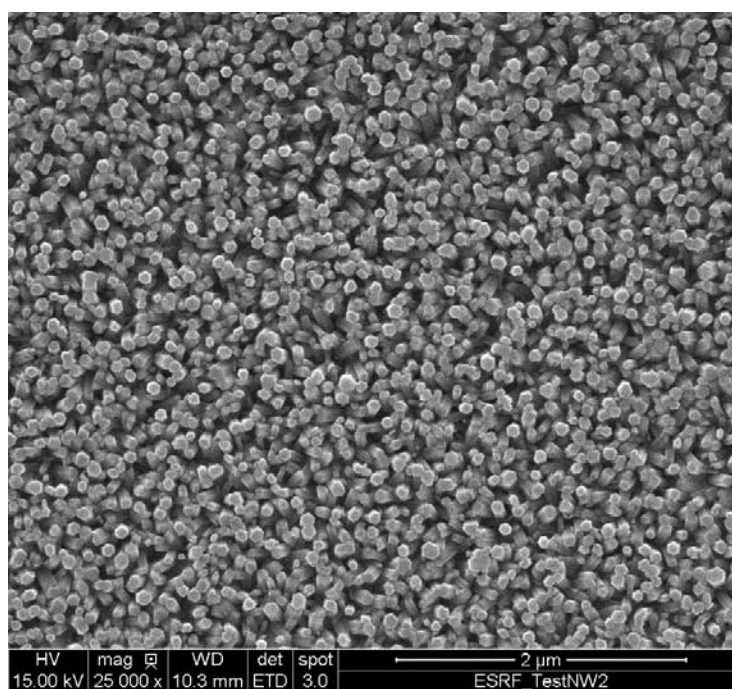

**Fig. S2** Typical FESEM image of ZnO NWs grown on a *c*-axis oriented polycrystalline ZnO seed layer using the designed leak-tight growth cell.
